# Supplementary figures and images for: Mapping QTL for Phenological and Grain-Related Traits in a Mapping Population Derived from High-Zinc-Biofortified Wheat
Source: MDPI journal article supplement (doi:10.3390/plants12010220), 2023-01-03

Supplementary Figure S1: Frequency distribution of DH, DM, PH, TKW, TW during 2017 – 18 (Y1), 2018 – 19 (Y2), 2019 – 20 (Y3), and across years.

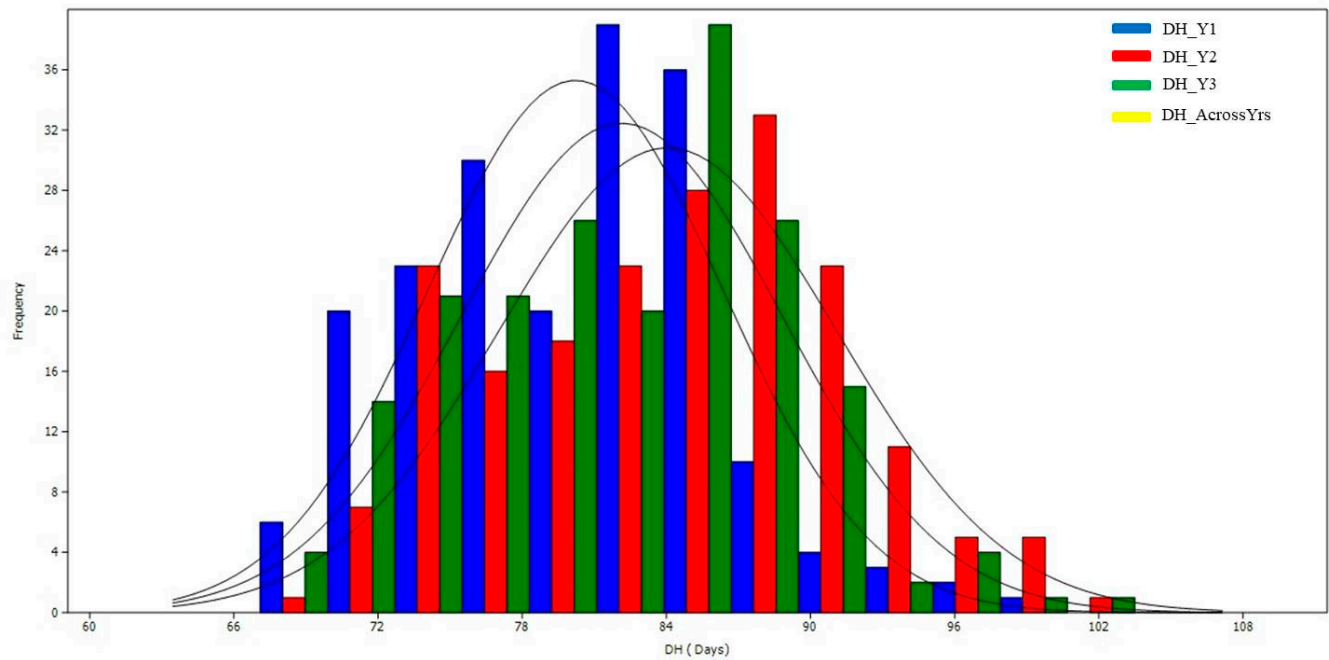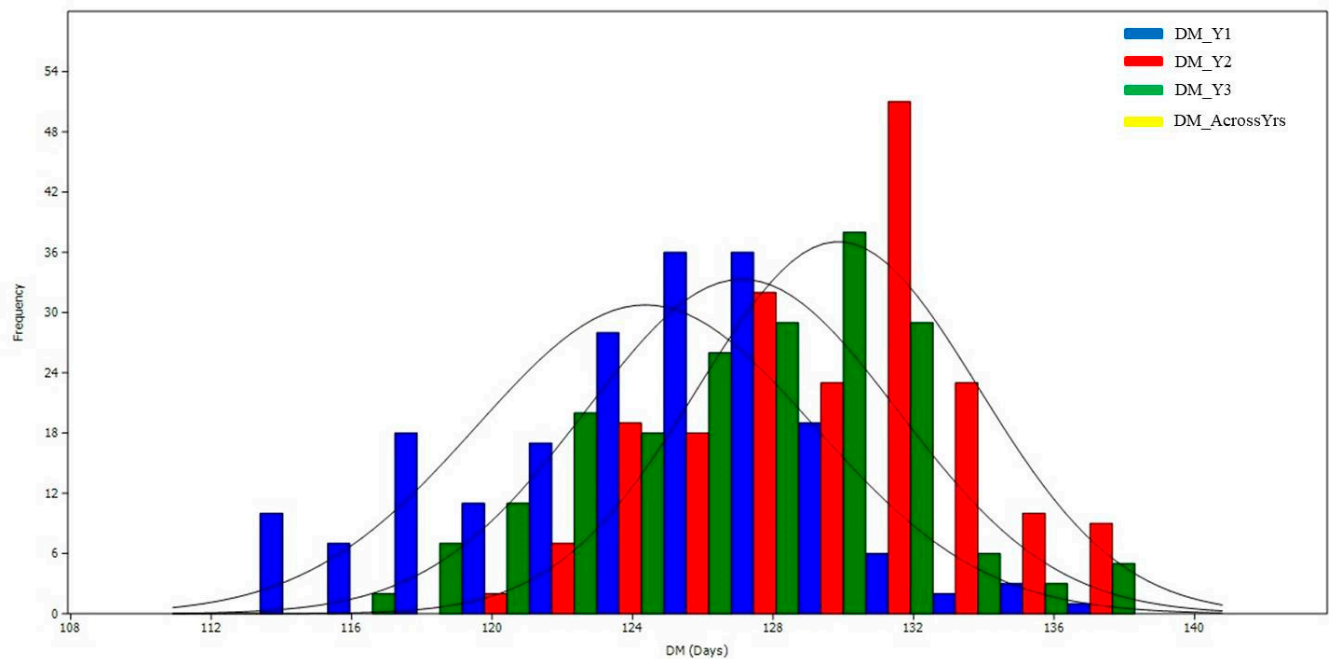

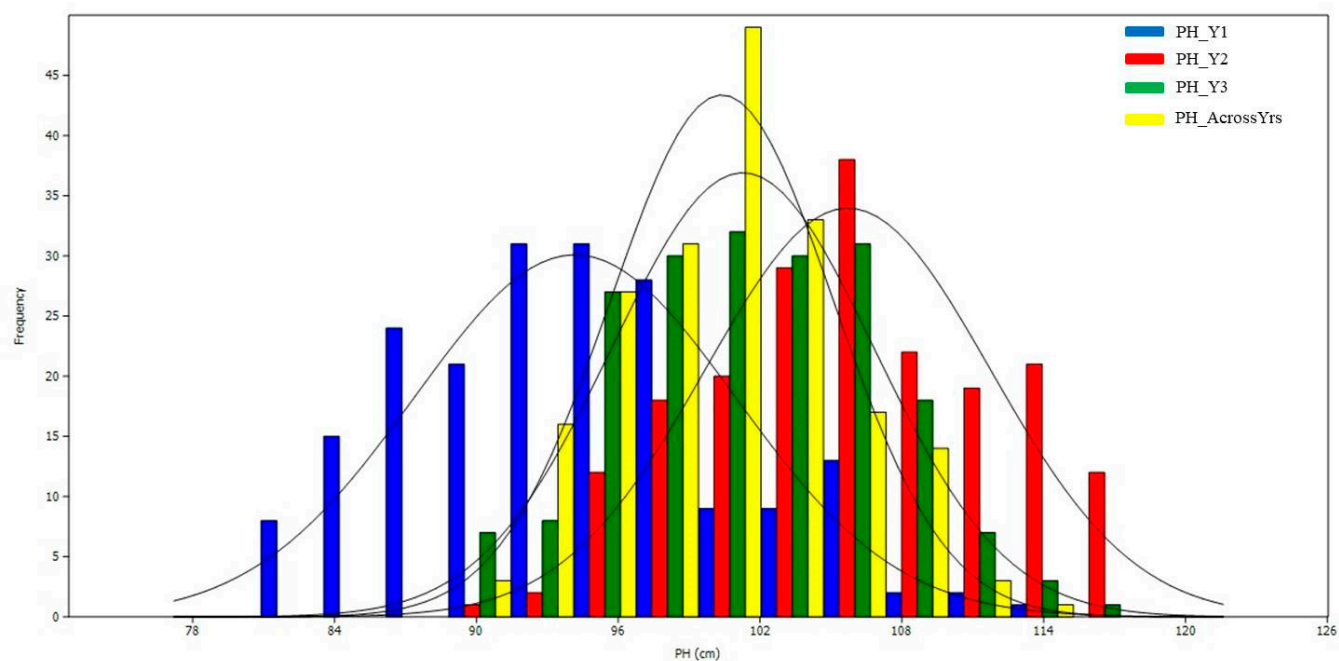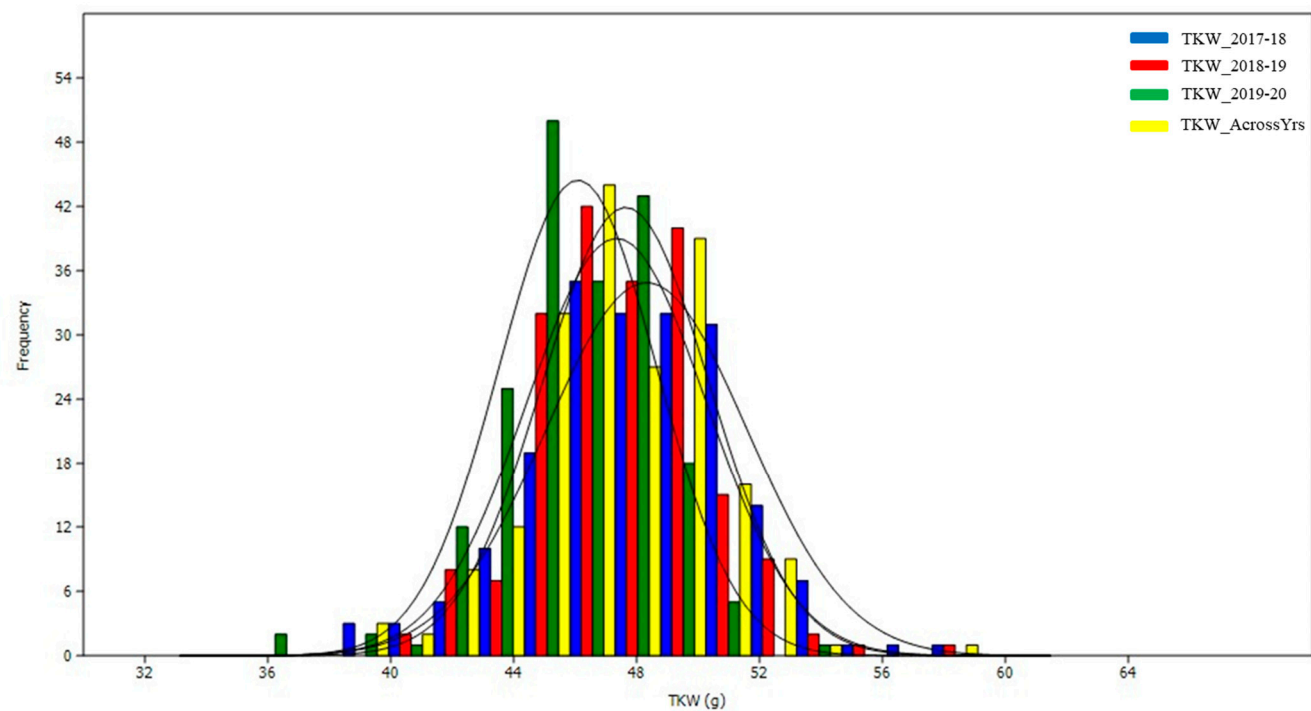

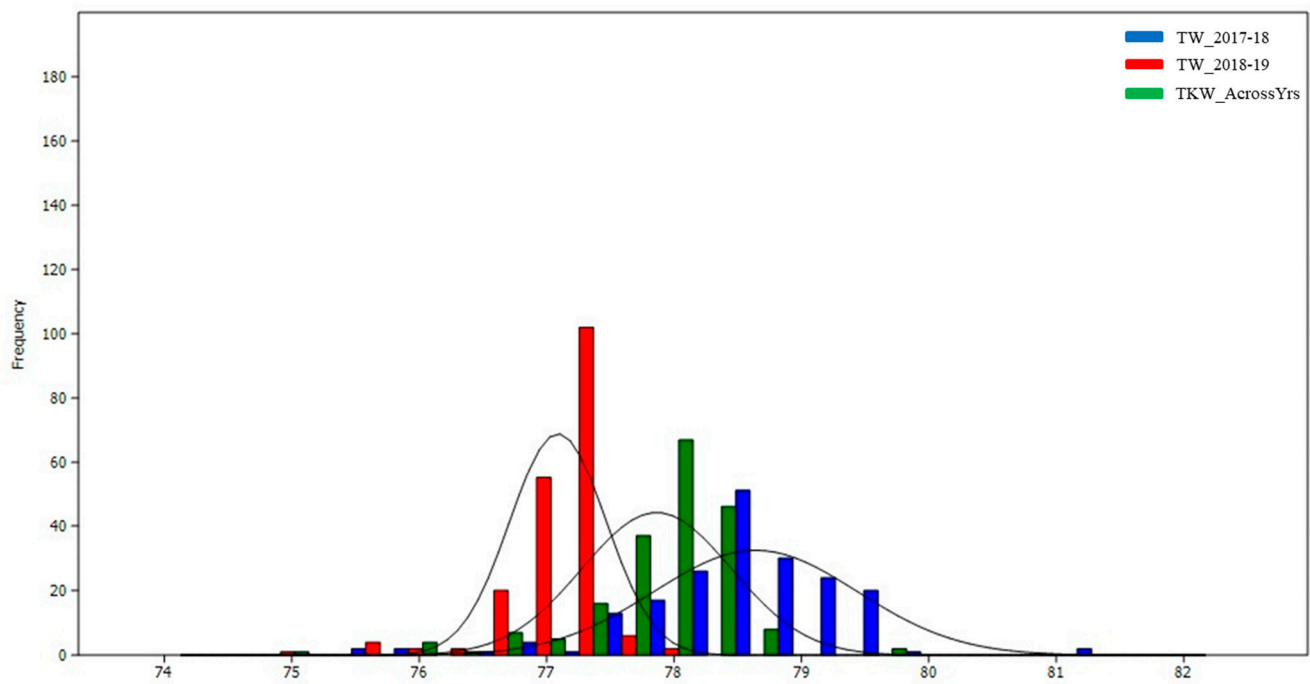

Supplement: s1 [file s1]
